# Supplementary material for: Obtaining Specific Sequence Tags for Yersinia pestis and Visually Detecting Them Using the CRISPR-Cas12a System
Source: MDPI journal article supplement (doi:10.3390/pathogens10050562), 2021-05-06
Supplement: s1 [file s1]

**Table S1.** PCR conditions

| Reagent names      | Volume (μL) |
|--------------------|-------------|
| DEPC water         | 19          |
| ExTaq              | 25          |
| Primer A(10μmol/L) | 2           |
| Primer B(10μmol/L) | 2           |
| template DNA       | 2           |

**Table S2.** Cas12a reaction conditions

| Reagent names   | Volume (μL) |
|-----------------|-------------|
| DEPC water      | 12          |
| NEBuffer 3      | 2           |
| Cas12a          | 1           |
| Probe           | 2           |
| crRNA(10μmol/L) | 1           |
| PCR/RPA product | 2           |

**Table S3.** RPA reaction conditions

| Reagent names        | Volume (μL) |
|----------------------|-------------|
| Primer A(10μmol/L)   | 2.4         |
| Primer B(10μmol/L)   | 2.4         |
| 2×Reaction Buffer    | 25          |
| dNTPs(10mM each)     | 2.3         |
| 10×Probe E-mix       | 5           |
| 20×Core Reaction Mix | 2.5         |
| DEPC water           | 6.9         |
| template DNA         | 1           |
| 280mM MgOAc          | 2.5         |

**Table S4.** The 97 *Y. pestis*-specific tags obtained in this study\*

| Tag names   | Start site | End site | Sequences (5'-3')                                                                                                                                                  |
|-------------|------------|----------|--------------------------------------------------------------------------------------------------------------------------------------------------------------------|
| YP_Etag 001 | 163534     | 163634   | TTGTTCGGATTATCGGTAACGTTCTCACTGTTCAACAATGAATT<br>CAATGGATTGCTGATGATGATCAGCATTAAAAGGAAGTAAGCT<br>GATGACTATT                                                          |
| YP_Etag 002 | 416199     | 416299   | ACGATGCGGTAGCTGCTGGAAACCATGGTGCCGAGTAGCAACAT<br>CAGCATCATGAATAGCAGGTTGCTGGCATTCTGAATTATCAGCAT<br>AGCTGTCTTAT                                                       |
| YP_Etag 003 | 421710     | 421810   | TAGCTGCTTTTATTCTGGTTGCCAGCCAGCGAGGGGAGGAAAGCC<br>CAATGACCAAGCAAGTGACATTTATCTGCGGGCTTCTTAATGGCG<br>TTCATGCCCCG                                                      |
| YP_Etag 004 | 421811     | 421911   | CCTGCGAGCCATATAGAAAGGGTATGCAACCGCTTCCAATCGCG<br>TTTCCACTGGTATAATCCGCGTCTGGCATCGTGGGAGATGGCAA<br>GAGCGTACTTT                                                        |
| YP_Etag 005 | 423005     | 423155   | AATCAAGGTGCCGAATCCATTGGCTTGTTTCGTACTGAAATATTG<br>TATATGGATCGTGCAGCCGCGCCTTCAGAAGAGGAGCTTTATACC<br>CTCTACGCTCAGGCACTTGGCGCTGCCAAGGGCAAACCGATTATT<br>ATTGCGACCATCGAT |

|                |         |         |                                                                                                                                                                    |
|----------------|---------|---------|--------------------------------------------------------------------------------------------------------------------------------------------------------------------|
| YP_Etag<br>006 | 424204  | 424304  | TTTTCCAAACTGGCGCGTCGGATCATGCACGAGGGGTTCGCGA<br>TGCGCTGGTTAGCGCTGGGACGGCCAGCAAGTAGAAATGCTGC<br>TGAAACACGAG                                                          |
| YP_Etag<br>007 | 467679  | 467829  | TTTTGGTTAAACATAATGGCAGTGGATTGAGTGCGBAACAGGT<br>AAAAGTGCTTAATCGCCTATTAGATGGCGGTGAGAATGGCTTTTC<br>TGCTGGGATAAATGCGTCACAATATCAGAAAGTCGCAAAGGTCA<br>GTAAAGCAACCGCCACG  |
| YP_Etag<br>008 | 508775  | 508875  | TTTCTCGGCCCATGGTGTGTACAGGCCGTTCCGGGCAGAGGCCCG<br>TTCACGTAATTTGACGATGCTGTTTGATGCAACCTGTCCATTGGTT<br>ACCAAAGTC                                                       |
| YP_Etag<br>009 | 517030  | 517180  | AAAATGCGGCTTTGAGTGAGATGGGATGCTGTGCAGTATTATCAA<br>TACTAAACTTACTTTCTCCCCGTGACAGCAGTGCTTGAATACCAA<br>TCCAGATCAGGTAGCAGGCCCGGCATATTTTCAGCAAATTGAAT<br>AACCATGGTGTGGTCG |
| YP_Etag<br>010 | 533856  | 533956  | GATCTTTCTGGCCACAGAGCAAAGCCTCTTCCTGCTGTTGAAGAT<br>CGTAAATTCCTTACTTTTCGATCAGGATAATTTTCGATGCCCGGATG<br>AGAGCAATTA                                                     |
| YP_Etag<br>011 | 553573  | 553723  | GCCGATATTGCGGTGTACTTGTTCTCAACAATATCGATAAGTTA<br>CCTGGCGGCGAAACCTTCCTCTCGTTAATGAACGACGAACTTCTG<br>GCCGAGGGCTTGGGATTAGCATGACCATAATGAAAAGGGGCA<br>GAACAATTTCTGTGCC    |
| YP_Etag<br>012 | 859300  | 859400  | GAAATTTGAGTTCAGAGGAAAATTTCCGGTGTGGAAGCGGTA<br>CGCAAAACATAATCAATGGATACAGAAATACAGGGAGGTCTGC<br>GATACGACTCGCA                                                         |
| YP_Etag<br>013 | 861387  | 861487  | ATTCATTGCCGTATGACTGCAACCTCGATGGCTTTTGTTATTTAT<br>AAGCATTCTACTTCCCACCCGAATCAGCCACCTAAACCACGG<br>CGCTCCATAA                                                          |
| YP_Etag<br>014 | 1000314 | 1000464 | GGGGGCGGCCTCTTGCCCTAACCGACGACCAAACCAGATCTCAG<br>CGGTAAATCCCGGATCCGGTTAAACAGCACGCTGTGGTTATGAG<br>TCTCATCGCTTTTAACCAGAATCAACACCGCTTCTGGCTCGTTGA<br>AGCCCGTCAGATAGCT  |
| YP_Etag<br>015 | 1034125 | 1034225 | GCCCGTCAGTTAGTGCAGCAAGCCGCTTCCGGGGCTTGCTCTG<br>GTCGAGGCTAACCCACACGTGCCACTTTCGGCCTTGCGAGAGCA<br>GGTCACGTCCA                                                         |
| YP_Etag<br>016 | 1056025 | 1056175 | CAGCCGTCAGTGCTGCTGATAGCGATCAGCGGAAAATATCGAT<br>AGCCGCGCGCTGTTCAATTCAAGACTCGATGCGCTAAACGAGCA<br>CTGGCTATTACTCGGTGGCCTGCGTACGACAGCTTCGATGTGAT<br>GGCAGGTAAAGGCCGCC   |
| YP_Etag<br>017 | 1568717 | 1568817 | TGGTGCCCGAGCACAGTTTGCTGCGGTGCCATTGAACTTGCTTGG<br>TGACCGCAACAGCGCTGACTATATCGATGGTGGCTATTGGGCGC<br>ACAGTGCGATT                                                       |
| YP_Etag<br>018 | 1569280 | 1569380 | GCGAAATGGAAGAGCGCAATCAGGCGAAAGCTGAACTATTGTA<br>CGGTGCCATCGACCGCACAGGCTTCTATCGCAATCAGTTGCTAT<br>TACTAACCGCTC                                                        |
| YP_Etag<br>019 | 1774064 | 1774214 | GTCATTCAAGGTATTCCGGTAGTTACGGGCGCGGAAGCGGAATA<br>ACAGGGCCTCCAACCGTGGGTCTGAAATGTCAAATCCAGTGCT<br>GGCAGATTTTGTGACTCAGTTTGCTGGATAATCTTTATGGTGGCGC<br>GATCAGCATCACTGAA  |
| YP_Etag<br>020 | 1846828 | 1846928 | GTTGCGCCCGATCACTTAAATCTTGACCAACTTCAATTTGGTTG<br>GCCCTTCCAAACGGTAAATCTGTGGTTGCCGTTGTAACAGCCCAA<br>TCAAATACAC                                                        |

|                |         |         |                                                                                                                                                                      |
|----------------|---------|---------|----------------------------------------------------------------------------------------------------------------------------------------------------------------------|
| YP_Etag<br>021 | 1868734 | 1868834 | TAGTTGTAGTGATATCACTATTATCTATCAATTATACGAGGCTATT<br>GAGGTTTCGATTGGTTTTGTAAAGGTTTGATATGATATGTGTTGT<br>GTATTAAC                                                          |
| YP_Etag<br>022 | 2085369 | 2085469 | TGGCTCTTTAATTGCGTCTGGATAGAACGCAATGTGCCATCCCCG<br>ACTAATGCACCATTACTCGTGGATTGATCCTGGCCTGTCTCTACA<br>ACGGTATATT                                                         |
| YP_Etag<br>023 | 2085954 | 2086054 | TTTTGGCCGGGTTGAGTAATCGTGATCGTGCGTGTTGCATCACTGC<br>TACCCAATTTATCTGTAGCGCTAGGCACATCTGCCGATAACAGCG<br>ATTGTGCTT                                                         |
| YP_Etag<br>024 | 2087369 | 2087469 | AATATAAAGGTGAAGTGGATGCTACTAATGGAAAAGTAACATTT<br>GCAGATGATGCTAATGGCGATCCAATTGATGACGCTACCAAGCT<br>GGAAGCAGCGGC                                                         |
| YP_Etag<br>025 | 2363736 | 2363836 | ACGAAAGGCGATCGCTCTATGTACCCATTGCGAACAGCGAACTC<br>CATCATCGCGGCAAAACAAGAAAGGTAGACGTTTACCGTTCTGA<br>CAGACCGACCTT                                                         |
| YP_Etag<br>026 | 2482968 | 2483118 | CAAAGGAGTAACGGTCAACTTTGGTTAAATCTGCAACATAGCGG<br>CTACCGGGTTTCGCAAATACGCGCTAGATCGTTACGAGCCAGATC<br>CACCAACATTAAATGTTCTGCCATCTCTTTATGGTCAGTACGCATT<br>TCCAACCTCGATACGGC |
| YP_Etag<br>027 | 2493249 | 2493399 | AAGAATACCCGCAAGATTCTGCGTAGCGGTGAAGTTGCACCACC<br>GAAAGAAGATCCGGTACCATTGTTAGAGTTGCCTTGCGAGAAAT<br>CAGATGCTTATTTTCGTCCTACGAGATGGCGCAGCTGGCGTGTTCT<br>TGGCAGCCAATACATTC  |
| YP_Etag<br>028 | 2847196 | 2847296 | AGATCAACGGCATCAGTCCCGACACCAAATATTGAGATGATCTG<br>CACTTCAGGCAATAACGCCAGGACCTCATTAGTGACGCCAATAT<br>CACCTCTAGTCA                                                         |
| YP_Etag<br>029 | 2847692 | 2847842 | TTATCATTACCGAAGCTGAATTGTTTCAGCTACAGAATAGGCGTT<br>AACAATCTCTGTCGCACCTTAGGGGGGAATGTTATTGGTTGATAC<br>GCATTGTTATACGTTGGCGTCACCTGTTAACAGGCGATAATTGAT<br>GAGCCGATGCTCTAC   |
| YP_Etag<br>030 | 2855736 | 2855886 | GGCTTCGCTATCCGCCGCCGGTGCGTACATAAACAAGCGCATCA<br>CTACGGCAAAGATAGCAATCTTGCTGGCGGTGCCAGGAACGTG<br>GAAACTGGCGCGGGTGCGCCCTGATACACATCGGGTGTCCACAA<br>TTGGAACGGTACCAACGA    |
| YP_Etag<br>031 | 2936317 | 2936417 | CCTATTCTTGAAAGGATTCGGTTGGGCACCGTTCTTAAAATACCA<br>AATAGTGAACCGACGAAGAAGGCGATCACCCAAGCACATAATG<br>ATAATGCGACCG                                                         |
| YP_Etag<br>032 | 2994868 | 2994968 | CCCCCTTGATGAACCTCATGGCTCTGGTCTGCACATTCACGGTATT<br>CACTCCCACGAAGAAGGCCATAGTCATGGTGATCACGATCATGA<br>CCACAGCCAT                                                         |
| YP_Etag<br>033 | 3196040 | 3196140 | TCGGGACCAGTCGCTGGCTGACAGCACGGCAACGCCAGAGTGAA<br>CCAATCAATAAACCCACCTGCAATTTTCATCATTTTCATTACCAC<br>CATTGGTGAAA                                                         |
| YP_Etag<br>034 | 3292861 | 3293011 | CCCCCTCAATGGGCGTGATCCAACCTTAAGCCAAATCTGAAGGAA<br>GGAGATTTGACTCAAGGGTATTGTGTTCCAGGGGCAGCTCGTTC<br>TTCACCCATATCGCACCTGGCGAGACAACCCGCTGCGAGTTCGCG<br>AGTGGTCAGGATGTGG   |
| YP_Etag<br>035 | 3293888 | 3294038 | GGCTCCTTATGGCGATAGCTTGGCGTACCTCTCTATTGAAGCTCA<br>GGTGACTAATCGGGATCTTCCGCGCCTGATTCCGCCAGTGGTAA<br>TTTTGAATTGACCATGTGCGATTACGCGCCCGTTACGGTGCCCG<br>GTTTGTCTTCCAACC     |

|                          |         |         |                                                                                                                                                                     |
|--------------------------|---------|---------|---------------------------------------------------------------------------------------------------------------------------------------------------------------------|
| YP_Etag<br>036           | 3296504 | 3296604 | CCCCATCCCCACAGTTGCAGCCGTTACAGTTGCAATCGGCACAGT<br>TGCAACCTGTACCGATACAGTCACAGCCGGTGCCTGTCCAGCAG<br>CAAGGGATCCA                                                        |
| YP_Etag<br>037           | 3297227 | 3297347 | CGTATCCTGCAACTTCACACTTCAGATTGCAACTCTATAAAATTA<br>AAGATACGTTGAATTTAACTGATACCAACGGCGAACGTGTTCTGC<br>CGGGTGGCACAATAGCTTATACCTGGGCGA                                    |
| YP_Etag<br>038           | 3297578 | 3297678 | CCGATAATAATTACATCAAGGTAAAAGACAGCCAGAACCAAGA<br>AGACCGGTTGCTTATCAAAATCAGCGACACCAACGGTCAACAGA<br>TGAAAGTGAATGG                                                        |
| YP_Etag<br>039           | 3300059 | 3300159 | CCCCCAAGTGTGCGACTCCCATTCGCGAGGAGACAGCGGAACCTG<br>TAGAACAGGAGAGTACGGTTATTTTAATTCTCGGTCCCTATGCTG<br>AGAAATGGTTT                                                       |
| YP_Etag<br>040           | 3300389 | 3300539 | CCCCCTCCCCTGCGTATTTGCTATTTACGCGCAGTTGAGTAATGA<br>ACGCCTTAGCCATAATTCTGATAACGCATATTGGACTGGAAATAT<br>TAATCTTGCGAACCAGCAGCCTATCGAGATTACGCAAGCCCTAC<br>AGTCACTGAGCCAACG  |
| YP_Etag<br>041           | 3300529 | 3300629 | TGAGCCAACGACTTGAGTTACAAGACATCAATCACTCAAGATTT<br>GCAACTCAGCGTAATGTTATGGCGCATAATTTATTTACTTG GTG<br>AATGAATCGGG                                                        |
| YP_Etag<br>042           | 3306447 | 3306597 | ATCTCTGGCGCGGGAGTATTGGCTTCCAGCAAACATCCGCAGCA<br>AGCCCAGAAATTCGTGCAATGGGTACCGGCAAAGCGGGGCAG<br>GATTTCTTGCGCGAGAGCAATAGCGCCTTTGAATATGCGGTTGGC<br>GTGAATGCCGCTTCCAAT   |
| YP_Etag<br>043           | 3365861 | 3366001 | TTGATTACCTTTGAATACCCTTGCCCTTGACGTTGCAACGGTGTT<br>CACCGCTCTCATGAACCCGAATGACTGACGCCTGTCAGCTCATCG<br>GGGTTTGCGCGTTAGCGGCCTTGCTGCAACAACAATGACTTGGGT<br>CGGT             |
| YP_Etag<br>044           | 3398458 | 3398608 | TAGTCCGCCAGCAATTTAGGTTTAGGTGGGTCGTCAGGTTTCGA<br>TATGGAATTACAGGACCATGGCGGCCATGGCCATGATAAATTGA<br>TGGTCGCCCGCAACCAATTGTTGCAGATGGCGTCGAGGAACCC<br>GCGTTAACCCGAGTGCG    |
| YP_Etag<br>045           | 3415596 | 3415696 | GCACAAGCGTGCCAATCAGAGAAGAATAGATCTTATGATTATCG<br>ATTAACGGCTCAGCTAAACCTAGTGACTAGCAAACGTGTTACAG<br>CTATTAGGATCA                                                        |
| YP_Etag<br>046           | 3432506 | 3432606 | AAAGCAGTTACTCGATAGCTTGGGTTTGGCAACTGCGCCGTGGCA<br>ATTGTTATCCAGCGCCAGTGAATGGCCTGAGGTGTTGCCACGTT<br>GGGTGAGCTA                                                         |
| YP_Etag<br>047           | 3433765 | 3433865 | ACCAACCTGTTTCAACATCGCACCGATGTCTAACAAACTCAGTGT<br>TGGGAACCTGGCGATTAACTGAACCAAAGCCTCTCCATCACCGTG<br>ATAGCGGAAG                                                        |
| YP_Etag<br>048           | 3434740 | 3434890 | CCCCACCAGCAACGAAATCAATACTAATGATCCCATTGACCACA<br>CCCATGGCCATAGCCCGGCAGTGGGTAACCTCTGCGGGCAATACC<br>GGCGCTAATAACCAAACCAATAGCCTCTCAAATAAGAGACCAAT<br>GACACTGCCGCAGAGGCC |
| YP_Etag<br>049(YP-<br>1) | 3580080 | 3580180 | TTTCCAAATAATTATGTAGGTGACAATTGTATACCTGCATAATTA<br>ATTAGCAATCAACCAGACTCGCTCCACACATTACATACATTACCA<br>ATCAACCCCC                                                        |
| YP_Etag<br>050           | 3580236 | 3580336 | ACCAGTGACGGGGTTTGC GTTCCATCAAGTACATGATGGGCGAC<br>GTCCTGATACAACGCTTACGACTAGCCAACACATCCAGTATTTT<br>TTCAACGATGG                                                        |
| YP_Etag<br>051           | 3614292 | 3614392 | TTAAGGAAGTTATTTGCTCGAATCGCAATGGGTGCGAGCACCC<br>ATTTCCGGCTTCATTAAGGTTAGTGATCACATGATCGGCATGGCC<br>AAAAGTCGATG                                                         |

|                          |         |         |                                                                                                                                                                      |
|--------------------------|---------|---------|----------------------------------------------------------------------------------------------------------------------------------------------------------------------|
| YP_Etag<br>052           | 3614656 | 3614756 | GCAATGAAAACACAACCTGGTGCCTCTACCACGGGTGTTAATTCA<br>ACTGACTTATCCGCCATTACCCGATCTCCCTATCAGCTCAGGGCT<br>TACCCCTCTATT                                                       |
| YP_Etag<br>053(YP-<br>2) | 3615675 | 3615825 | TTTACCCACGTTCGATGCCGGTGCCATGGACCGTGTGCGCCATGCAC<br>CACGCTGCCATGGTTACCGGACAGATTGGCCGCCAGATCCACGC<br>CCTTGCCCTCGGTACTGTTGCCATTGAGCGTAGCGTTATCCAGCG<br>TGCTCTCGCCATCGAT |
| YP_Etag<br>054           | 3616110 | 3616230 | AGTGCCTGTTGTGCGCCACACCTTGTAGAATCAACAAGTCAGCTTC<br>ACTGGTCCCGGTAACGTTTGAATTTTCGCCAATATCAATACCGTA<br>GCCCCGTGCCAGTAGTCGTTCCGTTAATCGA                                   |
| YP_Etag<br>055           | 3747405 | 3747505 | GCTGGGTATCCCAAATGACGCCCTTCCATCGCCGCTGCTACGGTA<br>CCCGAATAGATAACATCATCCCCTAAATTAGGGCCAGCATTAAAT<br>ACCAGAGACAA                                                        |
| YP_Etag<br>056           | 3773215 | 3773365 | GCACTACCAAGCCAATCACAAGTAGAAGCCGAGCAACTTAAAC<br>AAATCGGCGCCAAAGATTGTCTGCTGAAACCCATATCGTCTATCA<br>GGCTTATCCCTTTACTCTTGGCCGAAGACACGCACAGTAAAGTAC<br>CATCAGAGGAGCAACCA   |
| YP_Etag<br>057           | 3794158 | 3794258 | TAACGCCAACTTGCCACCCCTTTAGCGCCAACCTACTGTCAGTGAA<br>CTCAGATTTCGCGGTCAATTAGCCCTAATTCGCCACCGACTCACGC<br>CAAATCGCTG                                                       |
| YP_Etag<br>058           | 3800871 | 3801021 | ATTTTGATGGCCGCTGGTTGGGTAAAGCTCGTCTGATTGATAAC<br>CAACTGGTTGATTGTGCGCCACTGATATTTTACCGATCAGGCGGTT<br>GCTCATTCCCCTCAAGCCGCGAGTTGGCCCAAATCAACCAGGA<br>ACGCCAAGGTAAAAAGT   |
| YP_Etag<br>059           | 3853167 | 3853267 | GGGGAAGCCAGATTGGGCATAAAGAATCAATCAAGGATACCGC<br>CCGTGTATTAGGCCGTATGTATGACGGCATTCAATATCGTGGCTA<br>TGGGCAACGCGT                                                         |
| YP_Etag<br>060           | 3853273 | 3853423 | AACACTCGCAGAATTTGCCGGCGTACCGGTCTGGAATGGCCTGA<br>CCGATGAGTTTCATCCAACCCAACCTCCTGGCTGATTGTGCTACTA<br>TGCGGGAACACCTGCCCAATAAATCGCTGAATAAAATGACGTTG<br>GCGTACCTCGGTGATAC  |
| YP_Etag<br>061           | 3853453 | 3853553 | AGCGGCCGCACTGGTAGGAATGGATTACGCCTAGTCGCACCGA<br>AAGCCTGTTGGCCAGAGGAAGCCTTCGTTATCAGTTGCCAGGCA<br>CTGGCACAGAAA                                                          |
| YP_Etag<br>062           | 3943702 | 3943802 | AAAAGGGTCAGGTCATCCCGCAAGCCGACAACAATTGGCGTCTG<br>GCAATTCTTGATAGCAAGCAACCTTTGGATATTCGTTTGAACCC<br>TCTCCAACCTGC                                                         |
| YP_Etag<br>063           | 3943870 | 3944000 | GCTTCGCGGTTTATCACATCGATTTACAGAGAAAAGTAATCTCTGG<br>CGGCAACGCCTTACACTGTACGCTGCTGTACCCCCATAATACCCA<br>CTTGGAGTTATATCACAATCTATAACATGCATTTATTATG                          |
| YP_Etag<br>064           | 3955098 | 3955198 | CATCACAGCGCCTAACTTGTGGTGATGGGGCCTTTGTGGAAGAA<br>GAACAACACCTAGTAATTAAGCGATAACCCCACTGCGCGCCCT<br>CTTGATTGATTT                                                          |
| YP_Etag<br>065           | 3965883 | 3965983 | TCGAGCCAAACTTCATAACCTTGTTGTTGATAACTGCTCAGCAAA<br>TCCAGAACGGCATCGGGCACACAATCCGGGCGAGTCCCCACGCA<br>CAGGCCCAAA                                                          |
| YP_Etag<br>066           | 3994470 | 3994570 | TTTTGATGCAGTATTGACCCGTGAACGCATGGGTAGCACCGGGAT<br>TGGCAGTGGTATCGCAATACCTCATGGCAAGTTGGAAGAGGATA<br>CACTGCGCGCG                                                         |
| YP_Etag<br>067           | 3998082 | 3998232 | TATGATATCCCTTTCGCGATTACGTAAATCAGGAGTCAAGATGTT<br>ACGTGCTATCAAACTAAACTCGCCCCCTGCTGCCATTGGCCCTTA<br>TGTTCAGGTGTCGATCTGGGCAGCATGATCATGACTTCCGGTCA<br>GATCCCGATCGATCC    |

|                          |         |         |                                                                                                                                                                     |
|--------------------------|---------|---------|---------------------------------------------------------------------------------------------------------------------------------------------------------------------|
| YP_Etag<br>068           | 4107295 | 4107445 | TTCCTTTGCCAGCCAGGAGTACGGGGAAATACGGGCTTTATCGCG<br>GCGTGGATAATTGATTGTACACTGTGTAGTGGGTGACCATATTC<br>ATTGCAACGCAGCACAAATCTGCTGGCTGCATTGCGGGTCTTGCGC<br>GATACGTTTCGTAGTG |
| YP_Etag<br>069           | 4108043 | 4108143 | TTTTCATCCAACCAGAATTGGACAGAACTGCGGTAAAGCAACTG<br>ACTCTCTGCGCCCATATTATTGTTGGTGGTGACAGTAAATAGGG<br>TTTACTGGCGA                                                         |
| YP_Etag<br>070           | 4108256 | 4108406 | ATGCCTGTTGGCAACGCGATAGCCAGTGGTTCGGCAAAGCGGTT<br>ACCACTCTGGTTGCGGTAAATGAGCAGTTGGCTGGTGGCATA<br>AATAAGGTCAATGGTACCGGAGCCATCAATATCTGCCAGATAGA<br>TCGCTAGTGGATTAAAT     |
| YP_Etag<br>071           | 4109333 | 4109433 | AAGCCATAGTTAAAGTGTGAGAAGGCGTCCTGACGGAAATTCCA<br>GGATTTTCCTTTTATGATTACCGGCACTTGCTCCGCGATATTACTG<br>TATTCGCCGT                                                        |
| YP_Etag<br>072           | 4112156 | 4112256 | AAGCTTGATCGCCTTGGCTAATAATCAAGTCTAAGGTACGCATAA<br>AGATCGCCAGCTTATATTGCATCGGATCTTGATGGCAATAACAT<br>CCGGATCATC                                                         |
| YP_Etag<br>073(YP-<br>3) | 4125519 | 4125619 | ATTGTACAAAAATCTCTGTTAGACTCAGACCTATGGCGTTCTCTA<br>TTTTATCCGTATAAGTCGTCGTATTACTACGTCGCCACGGCACTTT<br>TCTGAACGA                                                        |
| YP_Etag<br>074           | 4189201 | 4189301 | TCATCACACGCGGAATAGCAACAATCACACAAGGAGCAATTTG<br>CGGATAATAGCGCTCCCGACAGTGTTACATAAGCTGGCCCATTC<br>CGTCCGGCTGG                                                          |
| YP_Etag<br>075           | 4190854 | 4191004 | CCATCCCGGTCTATGACACCTCCGGTCCCTATGGTGACCCACAAG<br>CTAAACTGGATGTTTATAACGGGCTGCCTAAACTGCGTGCCGCTT<br>GGGTGCGCAGATCGCCAAGATACTGAAGCGCTGGCATCTGTCACT<br>TCCGGCTTTACCCAAC |
| YP_Etag<br>076           | 4439029 | 4439179 | CCGTTATCGAGAGCAAAGCTAACGGATTGATTAGCTAATAGGTT<br>GTCATGAGCATCGGTAACCAACGCTTGTGCAATGTTACCGGCTTT<br>ACCATTGCAAGCTGGTTATCCAAGAACGACGTTAGCTTAAGCTG<br>GGCTGTCGAAACATCG   |
| YP_Etag<br>077           | 4442159 | 4442309 | CACCCGAGACGGTATGCGTCAGTGTGGTACTGGCAGTACCATTA<br>GCTCCTGTTCTTGCCTCTGTCGTACTTAATGTTGCCTGAGTATTA<br>CCGCAAAGTTGATGAGCTGCCCATAATCGGTTGGCCGTCGCCAT<br>CGGTTACTGTGGCTT    |
| YP_Etag<br>078           | 4450113 | 4450263 | CCTGTAATTGGCATGTCGATAGTTGCACGCTGACCAAAGTTGTCA<br>GAAGCAGCGAGTACCGCAGGATTGACGTCCTCCAGCTTATCTT<br>TTTCACGTGGCCCAAGAGAGGAAGCCTGAGTATGATGAACCTGT<br>CTTTCACGCATGTTGA    |
| YP_Etag<br>079           | 4450281 | 4450431 | GGTAACCATCATTAATTCATACTCACGGCAAACCCGTGTCCAG<br>GCAGCATAGGCGCTGACTATACGTTTACTACTCTTCGGGGCGAAG<br>ATTATCTCTGGATAAGTTGTACAAATAGATGCCGAGAAGGCTTAG<br>GCTCATCTCAACTCCTG  |
| YP_Etag<br>080           | 4450664 | 4450764 | AATTACATCAGGCTCATCCGGGCGGGTCTTCCAAGGCGTCAAA<br>TTGGCTTCTCAATAAATCGCTTGGCATAAAATGGCCGGAACGTGC<br>TTGCAACCGC                                                          |
| YP_Etag<br>081           | 4451806 | 4451956 | CATTGCCACCATTTTCAACGCCGATATGGGCAAAACGCTGCTGTA<br>CGGCACGTTGCTGGCAATCCCAACCGTGATTTTGGCAGGCCCGGT<br>GTACGCCCCGTTTCTAAAAGGAATTGATAAGCCTGTTCTGAAGG<br>GTTGTATAACCCGAA   |
| YP_Etag<br>082           | 4456200 | 4456300 | AAAATAATGTTTCATTGCGCGCGTAATGGTTATTTAACTGTTCTC<br>ACGAATAAACACGTCTAATTCGCCAGTGGCTTTGCACCATCAAT<br>AGCATTGGC                                                          |

|                          |         |         |                                                                                                                                                                      |
|--------------------------|---------|---------|----------------------------------------------------------------------------------------------------------------------------------------------------------------------|
| YP_Etag<br>083           | 4462370 | 4462520 | TTTATTCATAACGCGGTGCCTGTGGGTGAATGTCGATAGCCGCTA<br>GTCAATCACAAGCCGGTAAATGCAAAATGTCAGAAGCCGTTTCAT<br>AATTGTCATAAAGTTGAATAGTTAACCGAGATCACATTCCCGATA<br>GGGAAATCATCGCTAG  |
| YP_Etag<br>084           | 4462624 | 4462724 | AACTTGCTCGTGGTGGCGGTACCCTGATGGTGAGTGGTGTCGCG<br>GTGCTGGGCTTCGAGCAGGCAAGCCGCTTACAAAAGCAGGTCCA<br>GGAGCGGACAC                                                          |
| YP_Etag<br>085           | 4468034 | 4468184 | TCAGCCCAGATGACCGCGGCGGTCTCTATCGGTATTGCCAGTTAT<br>ACCGGCATGCCAGTATCGACCACTCAAGTGCTCTCTTCTGCTGTT<br>GCCGGGACCATGTTGGTTCGATGGCGGTGGCGTGCAGAGTAAAAC<br>GGTGAAGAGCATTATG  |
| YP_Etag<br>086           | 4469634 | 4469784 | TATTAGTGTAAGGAAATGAAATGGAAAATAGCCTGATAATCTCGC<br>ATTTAAGCCTATCTTGCCGTTTGTTCAATACCGATTAAATGTTAACG<br>TCTCATTTGGTATTGATTGTATCACCGTATTTCTCGCGCTGATCAC<br>CGTGCTCAAACATT |
| YP_Etag<br>087           | 4472832 | 4472952 | TATGCCTATTATCCTAATCCAGGTAGCTTCAGCCCCAATATGGATT<br>AATTACAGTTTCAGCGATAACCAACATCCCAGCAGATTAAATGA<br>TGGTGGCGGAGTATTAACACATGAGATCCGC                                    |
| YP_Etag<br>088           | 4479982 | 4480082 | CTCAGCAAGGCAGTGC GGCTCAGTGGCATCGATGGCAGCCTAT<br>TTAGGATTAGACCTCACACTGCCACGCATTGCGCTGATCGTCAGT<br>CTGCGTGAACA                                                         |
| YP_Etag<br>089           | 4480082 | 4480232 | AGAGCACACTCAGCAGCGGGATCTGGTCGAAATATTAAGCAACC<br>ACAGCCGTGAAACATTGGTACACCTTACATGGGTTTGAGCGGGTTG<br>TGGTGTCTATTGCCGCTGAACCTGCACACAGTGACGATCGTGAAG<br>TGACGGCCAGAAAGGC  |
| YP_Etag<br>090           | 4481162 | 4481262 | ACTGGCACTGGCAGTTGCGACGATGCTGCTGACAGCGGTCCGGG<br>TGTTTATCGATGTCGCGGTGATTACCGTTTCCCCAATCGCTCTGGC<br>CATTGCGCAC                                                         |
| YP_Etag<br>091           | 4481507 | 4481607 | TGATACTGCGCTGCCTGCCTTTGGTGCAGCAATGGCGGCACCTCT<br>GGTCGCCATCTTCTACTGGCATTACGCCCTATAGCTGGCATTGC<br>CATTGACCCC                                                          |
| YP_Etag<br>092           | 4482938 | 4483088 | TACAACCGGGGATTGAGATAGTCACCGAAGCGCTAAAATTAGCG<br>GCTACCGTGCAAAATGCTGATTTAGTCATTACCGGCGAAGGGCGT<br>ATCGATAGCCAAACCATTTACGGCAAAAACACCGGTCCGGGTGGC<br>GCGAGTCGCGAAGCGTT  |
| YP_Etag<br>093           | 4488099 | 4488249 | GTCGCATTTGAGCCACCCGCTGAAATATAGATACCCGCACCTTG<br>GTCGCATGAGTACTATTAATGGTGTTATTCGCGCCCGTTAAGCTC<br>CCTCCGGAACCATCCAGATAAATGCCATAGTACCACTGCCACT<br>GGTATTGAGGGTGGTA     |
| YP_Etag<br>094           | 4491184 | 4491334 | CGTTACGGTCTGGCAATAACCGCACTACCCTCTGGGGATTTTTTA<br>CTGCTGGCCAACAAAGCAAGCCTGATAACCCAGGATCGCGCCTC<br>AGCAGAGGAGCTGCAAGATCACACCTGTCAGGTGCTACCTCACC<br>TCCCGGTGCAATAACAC   |
| YP_Etag<br>095           | 4492530 | 4492630 | TCCCGGATAAGACCAATTGTAGATCCAGCCCCGCCAGATTTCCG<br>GGATCGGTTAAGGTCCCGACGACGGCCACCAGAGTAGAACCGTA<br>GCGCATATCCGC                                                         |
| YP_Etag<br>096(YP-<br>4) | 4493379 | 4493529 | CAAAAGGCCGTTGTAACTCGGCGGAGACTTTTTGGTTAATCGTTG<br>GCTTCAAGCGATTCCAGTCAAAAGAAGAGACAAATATCACCACC<br>GCCACCAATGACAACAGGATAAACCCTGCGGCCACCAATAC<br>TTTTCCGGTCTTGTC        |
| YP_Etag<br>097           | 4595084 | 4595184 | TTTTGCCACCCAGATAATGCAGTGAAATGATTTCGAGTCTACCAAC<br>CCGACGATCTCAATGCCCTGATGCAACTGTGGCTAACCAGTACTA<br>TTGACGCGCA                                                        |

\*The *Y. pestis* CO92 strain was used as the reference (GenBank: NC\_003143, 13-DEC-2020).
